# Supplementary material for: A feature selection method based on multiple kernel learning with expression profiles of different types
Source: Springer Nature journal article supplement (doi:10.1186/s13040-017-0124-x), 2017-02-01
Supplement: MOESM3 [file 13040_2017_124_MOESM3_ESM.pdf]

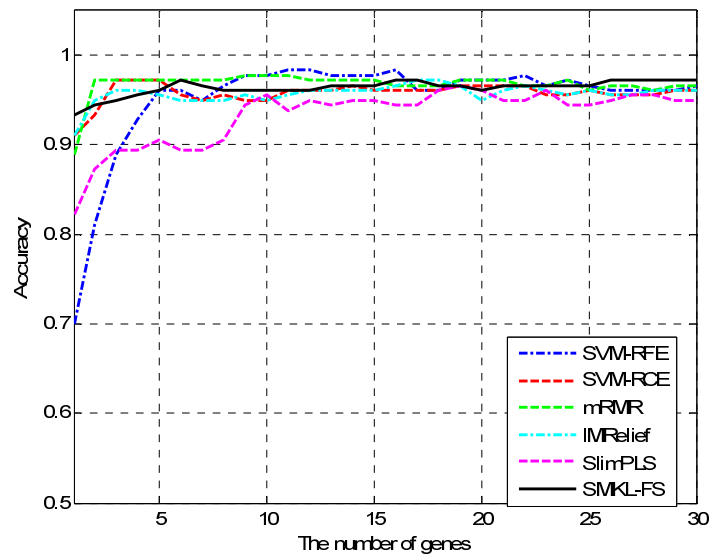

KIDNEY

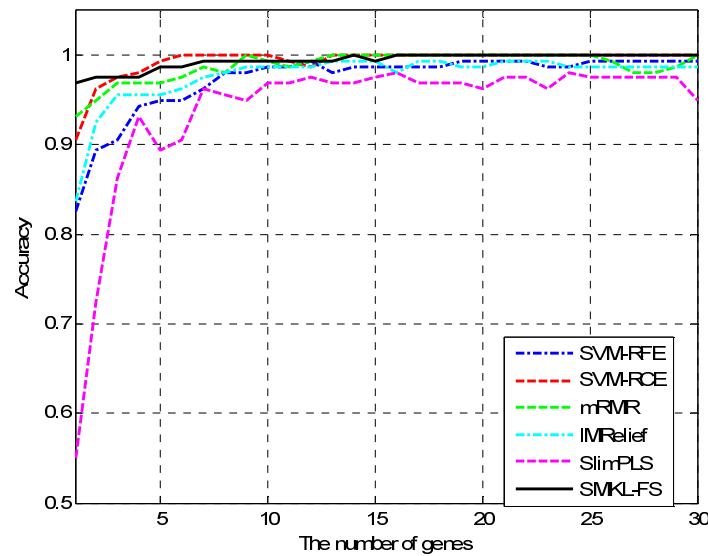

BRCA

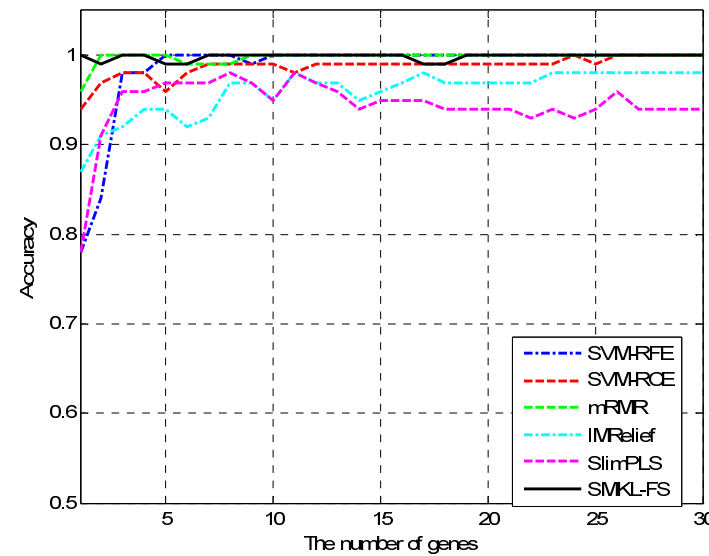

LUNG

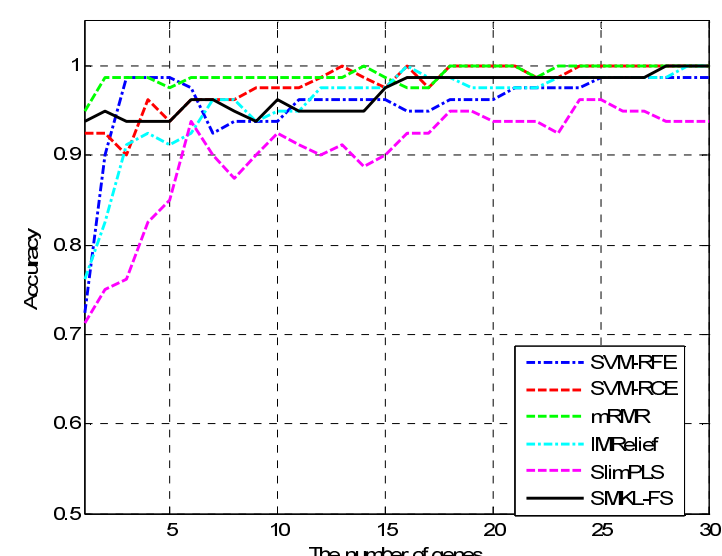

HNSC

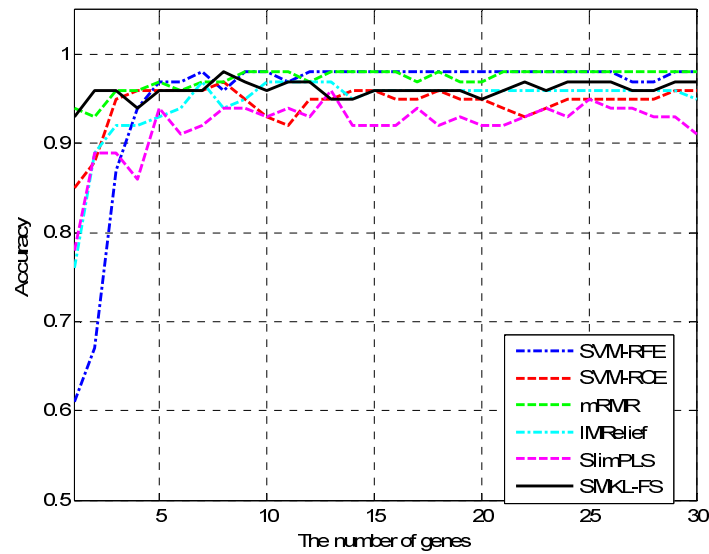

LIHC

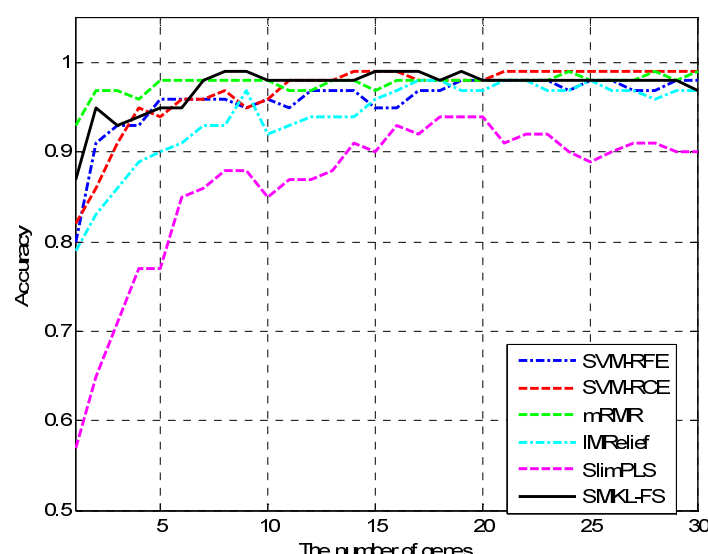

PRAD

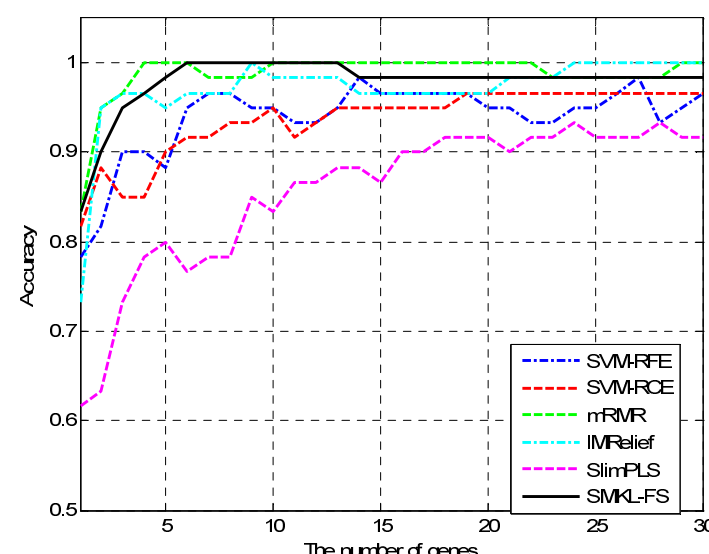

STAD

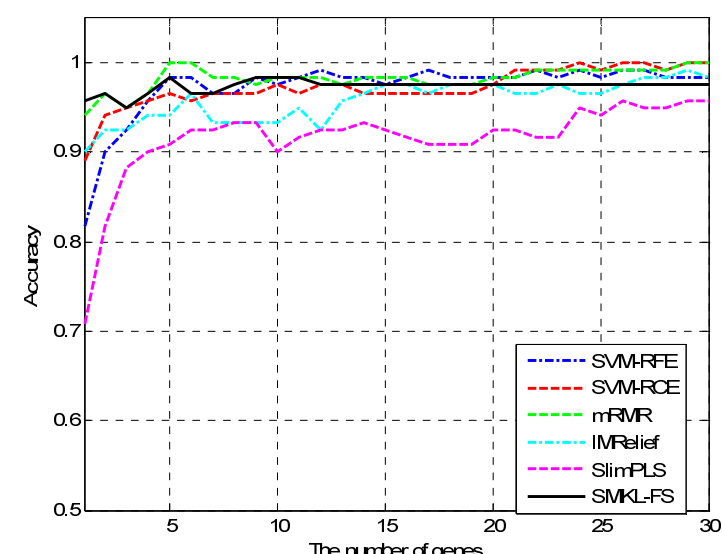

THCA
